# Supplementary material for: A new polymorph of Cd3B2O6: synthesis, crystal structure and phase transformation
Source: Royal Society of Chemistry journal article supplement (doi:10.1039/c4ra00671b), 2014-01-01

## Supporting Information

### A new polymorph $\text{Cd}_3\text{B}_2\text{O}_6$ : synthesis, crystal structure and phase transformation

Xingwen Zhang,<sup>a,b</sup> Hongwei Yu,<sup>a,b</sup> Hongping Wu,<sup>\*a</sup> Shilie Pan,<sup>\*a</sup> Anqing Jiao,<sup>a,b</sup> Bingbing Zhang,<sup>a,b</sup> Zhihua Yang<sup>a</sup>

<sup>a</sup> Key Laboratory of Functional Materials and Devices for Special Environments of CAS; Xinjiang Key Laboratory of Electronic Information Materials and Devices; Xinjiang Technical Institute of Physics & Chemistry of CAS, 40-1 South Beijing Road, Urumqi 830011, China

<sup>b</sup> University of Chinese Academy of Sciences, Beijing 100049, China

To whom correspondence should be addressed. E-mail: [wuhp@ms.xjb.ac.cn](mailto:wuhp@ms.xjb.ac.cn) (Hongping Wu); [slpan@ms.xjb.ac.cn](mailto:slpan@ms.xjb.ac.cn) (Shilie Pan).

**Table S1.** Atomic coordinates ( $\times 10^4$ ) and equivalent isotropic displacement parameters ( $\text{\AA}^2 \times 10^3$ ) for  $\beta$ -Cd<sub>3</sub>B<sub>2</sub>O<sub>6</sub>.  $U_{\text{eq}}$  is defined as one-third of the trace of the orthogonalized  $U_{ij}$  tensor. BVS is the calculated bond valence sum in  $\beta$ -Cd<sub>3</sub>B<sub>2</sub>O<sub>6</sub>.

| Atom | x        | y        | z        | U(eq) | BVS  |
|------|----------|----------|----------|-------|------|
| Cd1  | 7295(1)  | 650(1)   | 5590(1)  | 9(1)  | 2.08 |
| Cd2  | 3739(1)  | 7604(1)  | 19(1)    | 10(1) | 1.93 |
| Cd3  | 1323(1)  | 4430(1)  | 7067(1)  | 10(1) | 1.95 |
| B1   | 3804(6)  | 4335(6)  | 3605(5)  | 10(1) | 2.90 |
| B2   | 9108(6)  | -1672(6) | 8731(5)  | 10(1) | 2.92 |
| O1   | 3917(4)  | 2427(4)  | 5039(3)  | 11(1) | 1.93 |
| O2   | 5375(4)  | 4704(4)  | 2052(3)  | 11(1) | 1.99 |
| O3   | 6911(4)  | -729(4)  | 8815(3)  | 11(1) | 2.04 |
| O4   | 2053(4)  | 5973(4)  | 3849(3)  | 11(1) | 1.90 |
| O5   | 10115(4) | -2565(4) | 10291(3) | 13(1) | 1.98 |
| O6   | 10244(4) | -1710(4) | 6961(3)  | 13(1) | 1.93 |

**Table S2.** Anisotropic displacement parameters ( $\text{\AA}^2 \times 10^3$ ) for  $\beta$ - $\text{Cd}_3\text{B}_2\text{O}_6$ .

| Atom | $U_{11}$ | $U_{22}$ | $U_{33}$ | $U_{23}$ | $U_{13}$ | $U_{12}$ |
|------|----------|----------|----------|----------|----------|----------|
| Cd1  | 9(1)     | 9(1)     | 9(1)     | -1(1)    | -1(1)    | -1(1)    |
| Cd2  | 9(1)     | 10(1)    | 12(1)    | -4(1)    | 0(1)     | -1(1)    |
| Cd3  | 9(1)     | 12(1)    | 8(1)     | -1(1)    | 0(1)     | -2(1)    |
| B1   | 11(2)    | 11(2)    | 9(2)     | -4(1)    | -2(1)    | -4(1)    |
| B2   | 11(2)    | 8(2)     | 11(2)    | -2(1)    | 1(1)     | -2(1)    |
| O1   | 11(1)    | 10(1)    | 12(1)    | 0(1)     | -3(1)    | -2(1)    |
| O2   | 11(1)    | 12(1)    | 9(1)     | -4(1)    | 0(1)     | -1(1)    |
| O3   | 9(1)     | 12(1)    | 12(1)    | -3(1)    | 0(1)     | -2(1)    |
| O4   | 11(1)    | 10(1)    | 13(1)    | -4(1)    | -2(1)    | -1(1)    |
| O5   | 12(1)    | 19(1)    | 9(1)     | 1(1)     | -3(1)    | -4(1)    |
| O6   | 12(1)    | 15(1)    | 10(1)    | -2(1)    | 0(1)     | 3(1)     |

**Table S3.** Selected bond lengths (Å) and angles (deg.) for  $\beta$ -Cd<sub>3</sub>B<sub>2</sub>O<sub>6</sub>.

| Atom Contact  | Lengths/Angles | Atom Contact  | Lengths/Angles |
|---------------|----------------|---------------|----------------|
| Cd1-O1        | 2.257(2)       | Cd3-O2#3      | 2.378(2)       |
| Cd1-O1#2      | 2.288(2)       | Cd3-O4        | 2.349(2)       |
| Cd1-O3        | 2.330(2)       | Cd3-O4#8      | 2.333(2)       |
| Cd1-O4#3      | 2.306(2)       | Cd3-O5#7      | 2.143(2)       |
| Cd1-O6        | 2.367(2)       | Cd3-O6#9      | 2.364(2)       |
| Cd1-O6#1      | 2.244(2)       | B1-O1         | 1.391(4)       |
| Cd2-O2        | 2.284(2)       | B1-O2         | 1.371(4)       |
| Cd2-O2#6      | 2.284(2)       | B1-O4         | 1.390(4)       |
| Cd2-O3#3      | 2.250(2)       | B2-O3         | 1.389(4)       |
| Cd2-O3#5      | 2.268(2)       | B2-O5         | 1.366(4)       |
| Cd2-O5#4      | 2.206(2)       | B2-O6         | 1.388(4)       |
| Cd3-O1        | 2.424(2)       |               |                |
| O1-Cd1-O1#2   | 86.38(9)       | O3#3-Cd2-O5#4 | 89.41(9)       |
| O1-Cd1-O3     | 104.48(8)      | O3#5-Cd2-O5#4 | 152.89(9)      |
| O1-Cd1-O4#3   | 84.34(8)       | O1-Cd3-O2#3   | 83.54(8)       |
| O1-Cd1-O6     | 163.76(9)      | O1-Cd3-O4     | 59.43(8)       |
| O1-Cd1-O6#1   | 108.33(8)      | O1-Cd3-O4#8   | 100.74(8)      |
| O1#2-Cd1-O3   | 94.65(8)       | O1-Cd3-O5#7   | 118.47(9)      |
| O1#2-Cd1-O4#3 | 170.71(8)      | O1-Cd3-O6#9   | 133.12(8)      |
| O1#2-Cd1-O6   | 89.16(8)       | O2#3-Cd3-O4   | 97.78(8)       |
| O1#2-Cd1-O6#1 | 101.49(9)      | O2#3-Cd3-O4#8 | 173.31(8)      |
| O3-Cd1-O4#3   | 87.32(8)       | O2#3-Cd3-O5#7 | 99.61(9)       |
| O3-Cd1-O6     | 60.31(8)       | O2#3-Cd3-O6#9 | 82.64(8)       |
| O3-Cd1-O6#1   | 144.09(8)      | O4-Cd3-O4#8   | 80.24(9)       |
| O4#3-Cd1-O6   | 99.67(9)       | O4-Cd3-O5#7   | 162.09(9)      |
| O4#3-Cd1-O6#1 | 81.85(9)       | O4-Cd3-O6#9   | 78.47(8)       |
| O6-Cd1-O6#1   | 87.86(9)       | O4#8-Cd3-O5#7 | 82.94(9)       |
| O2-Cd2-O2#6   | 84.95(9)       | O4#8-Cd3-O6#9 | 90.70(8)       |
| O2-Cd2-O3#3   | 110.64(9)      | O5#7-Cd3-O6#9 | 107.94(9)      |
| O2-Cd2-O3#5   | 95.51(8)       | O1-B1-O2      | 123.4(3)       |
| O2-Cd2-O5#4   | 111.52(8)      | O1-B1-O4      | 116.7(3)       |
| O2#6-Cd2-O3#3 | 161.09(9)      | O2-B1-O4      | 119.8(3)       |
| O2#6-Cd2-O3#5 | 89.43(9)       | O3-B2-O5      | 122.7(3)       |
| O2#6-Cd2-O5#4 | 94.80(9)       | O3-B2-O6      | 116.4(3)       |
| O3#3-Cd2-O3#5 | 78.76(9)       | O5-B2-O6      | 120.9(3)       |

Note. Symmetry transformations used to generate equivalent atoms:

#1 -x+2,-y,-z+1    #2 -x+1,-y,-z+1    #3 -x+1,-y+1,-z+1  
#4 x-1,y+1,z-1    #5 x,y+1,z-1    #6 -x+1,-y+1,-z  
#7 -x+1,-y,-z+2    #8 -x,-y+1,-z+1    #9 x-1,y+1,z

#10  $x, y-1, z+1$     #11  $x+1, y-1, z+1$     #12  $x+1, y-1, z$

**Table S4.** Magnitude of the SOJT distortion of the  $\text{CdO}_6$  octahedra in  $\alpha$ - $\text{Cd}_3\text{B}_2\text{O}_6$  and  $\text{CdO}_n$  ( $n = 5, 6$ ) polyhedra in  $\beta$ -  $\text{Cd}_3\text{B}_2\text{O}_6$ .

| compd.   | species         | dipole moment |         |         |           |                                                           |
|----------|-----------------|---------------|---------|---------|-----------|-----------------------------------------------------------|
|          |                 | $x(a)$        | $y(b)$  | $z(c)$  | magnitude |                                                           |
|          |                 |               |         |         | debye     | $\times 10^{-4} \text{ esu} \cdot \text{cm} / \text{Å}^3$ |
| $\alpha$ | $\text{Cd1O}_6$ | 0             | 0       | 0       | 0         | 0                                                         |
|          | $\text{Cd2O}_6$ | 0             | 0       | 1.7097  | 1.7097    | 132.84                                                    |
| $\beta$  | $\text{Cd1O}_6$ | 1.4311        | -0.4057 | 1.9625  | 2.5389    | 190.65                                                    |
|          | $\text{Cd2O}_5$ | 1.7214        | -0.6944 | 0.5371  | 1.8826    | 141.37                                                    |
|          | $\text{Cd3O}_6$ | -0.2781       | 2.2089  | -3.1907 | 3.4606    | 259.87                                                    |

**Figure S1** The linked styles of each Cd1 octahedron, Cd2 hexahedron, Cd3 octahedron, B1 planar and B2 planar group with other CdO<sub>n</sub> (n = 5, 6) distorted polyhedra in  $\beta$ -Cd<sub>3</sub>B<sub>2</sub>O<sub>6</sub>.

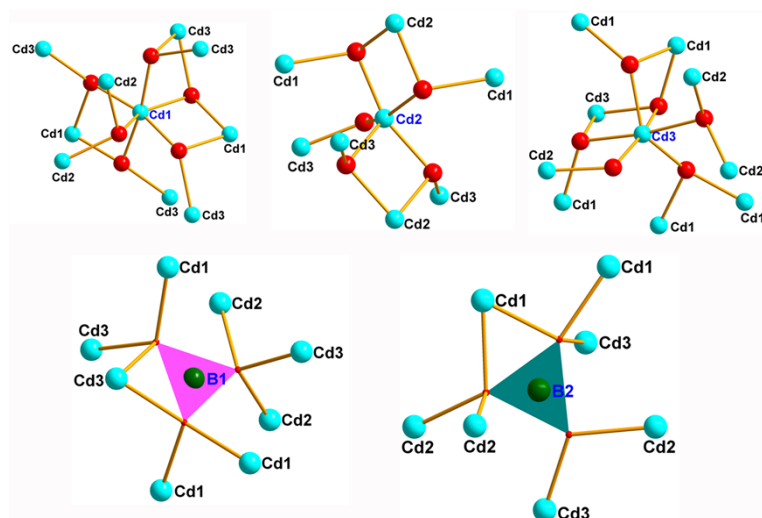

**Figure S2** The IR spectra of  $\alpha$ - $\text{Cd}_3\text{B}_2\text{O}_6$  (a) and  $\beta$ - $\text{Cd}_3\text{B}_2\text{O}_6$  (b).

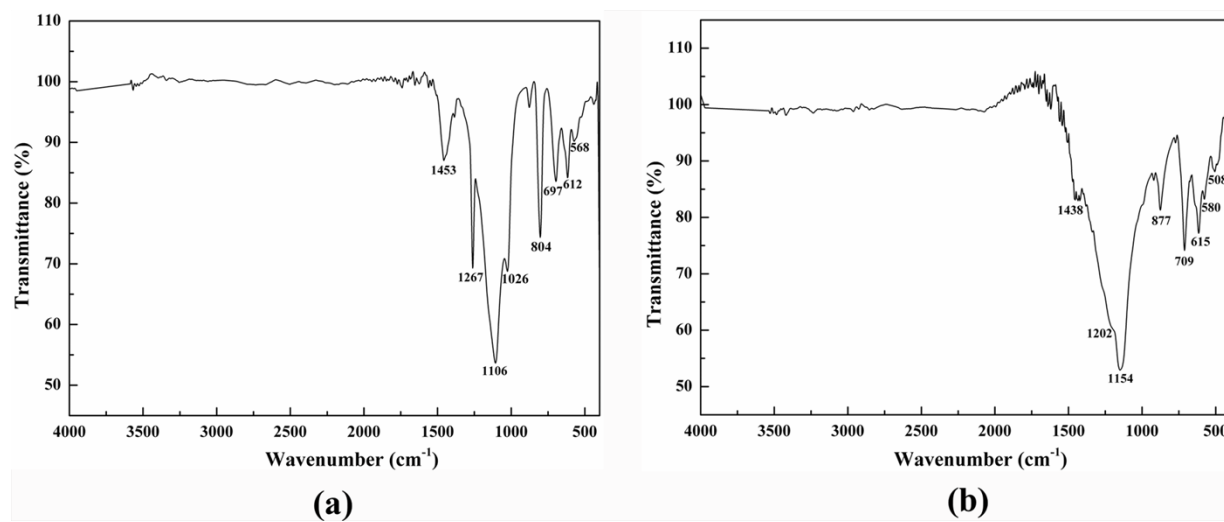

Supplement: c4ra00671b2.pdf [file c4ra00671b2.pdf]
